# Supplementary material for: Structure of water-in-salt and water-in-bisalt electrolytes
Source: Royal Society of Chemistry journal article supplement (doi:10.1039/d2cp00537a), 2022-01-01
Supplement: d2cp00537a2.pdf [file d2cp00537a2.pdf]

## Supplementary Information

### Structure of Water-in-Salt and Water-in-Bisalt Electrolytes

Miguel Angel González, Hiroshi Akiba, Oleg Borodin, Gabriel Julio Cuello, Louis Hennet, Shinji Kohara, Edward J. Maginn, Lucile Mangin-Thro, Osamu Yamamuro, Yong Zhang, David L. Price and Marie-Louise Saboungi.

Table S1. Concentrations ( $c$ ), atomic numbers ( $Z$ ), and coherent neutron scattering lengths ( $b_{\text{coh}}$ ) for the 13.9 m LiTFSI solution. Neutron scattering lengths from [1].

| <b>Element</b> | <b><math>c</math></b> | <b><math>Z</math></b> | <b><math>b_{\text{coh}}</math></b> | <b><math>c \times Z</math></b> | <b><math>c \times b_{\text{coh}}</math></b> |
|----------------|-----------------------|-----------------------|------------------------------------|--------------------------------|---------------------------------------------|
| Li             | 0.036                 | 3                     | -1.9                               | 0.107                          | -0.068                                      |
| C (TFSI)       | 0.071                 | 6                     | 6.646                              | 0.429                          | 0.475                                       |
| N (TFSI)       | 0.036                 | 7                     | 9.36                               | 0.250                          | 0.334                                       |
| O (TFSI)       | 0.143                 | 8                     | 5.803                              | 1.143                          | 0.829                                       |
| F (TFSI)       | 0.214                 | 9                     | 5.654                              | 1.929                          | 1.212                                       |
| S (TFSI)       | 0.071                 | 16                    | 2.847                              | 1.143                          | 0.203                                       |
| O (water)      | 0.143                 | 8                     | 5.803                              | 1.143                          | 0.800                                       |
| H (water)      | 0.286                 | 1                     | -3.739                             | 0.286                          | -1.068                                      |
| D (water)      | 0.286                 | 1                     | 6.671                              | 0.286                          | 1.906                                       |

Table S2. Concentrations ( $c$ ), atomic numbers ( $Z$ ), and coherent neutron scattering lengths ( $b_{\text{coh}}$ ) for the 21 m LiTFSI solution. Neutron scattering lengths from [1].

| Element   | $c$   | $Z$ | $b_{\text{coh}}$ | $c \times Z$ | $c \times b_{\text{coh}}$ |
|-----------|-------|-----|------------------|--------------|---------------------------|
| Li        | 0.042 | 3   | -1.9             | 0.125        | -0.079                    |
| C (TFSI)  | 0.083 | 6   | 6.646            | 0.500        | 0.554                     |
| N (TFSI)  | 0.042 | 7   | 9.36             | 0.292        | 0.390                     |
| O (TFSI)  | 0.167 | 8   | 5.803            | 1.333        | 0.967                     |
| F (TFSI)  | 0.250 | 9   | 5.654            | 2.250        | 1.413                     |
| S (TFSI)  | 0.083 | 16  | 2.847            | 1.333        | 0.237                     |
| O (water) | 0.111 | 8   | 5.803            | 0.889        | 0.645                     |
| H (water) | 0.222 | 1   | -3.739           | 0.222        | -0.831                    |
| D (water) | 0.222 | 1   | 6.671            | 0.222        | 1.482                     |

Table S3. Concentrations ( $c$ ), atomic numbers ( $Z$ ), and coherent neutron scattering lengths ( $b_{\text{coh}}$ ) for the (21 m + 7 m) LiTFSI-LiOTf solution. Neutron scattering lengths from [1].

| Element   | $c$   | $Z$ | $b_{\text{coh}}$ (fm) | $c \times Z$ | $c \times b_{\text{coh}}$ |
|-----------|-------|-----|-----------------------|--------------|---------------------------|
| Li        | 0.049 | 3   | -1.9                  | 0.148        | -0.094                    |
| C (TFSI)  | 0.074 | 6   | 6.646                 | 0.444        | 0.492                     |
| N (TFSI)  | 0.037 | 7   | 9.36                  | 0.259        | 0.347                     |
| O (TFSI)  | 0.148 | 8   | 5.803                 | 1.185        | 0.860                     |
| F (TFSI)  | 0.222 | 9   | 5.654                 | 2.000        | 1.256                     |
| S (TFSI)  | 0.074 | 16  | 2.847                 | 1.185        | 0.211                     |
| C (OTf)   | 0.012 | 6   | 6.646                 | 0.074        | 0.082                     |
| O (OTf)   | 0.037 | 8   | 5.803                 | 0.296        | 0.215                     |
| F (OTf)   | 0.037 | 9   | 5.654                 | 0.333        | 0.209                     |
| S (OTf)   | 0.012 | 16  | 2.847                 | 0.198        | 0.038                     |
| O (water) | 0.099 | 8   | 5.803                 | 0.790        | 0.573                     |
| H (water) | 0.198 | 1   | -3.739                | 0.198        | -0.739                    |
| D (water) | 0.198 | 1   | 6.671                 | 0.198        | 1.318                     |

Table S4. Composition of MD simulation boxes and corresponding densities at 298 K. Density values given in parentheses correspond to the experimental densities at 298 K estimated with the equation and parameters given in [2]. Two polarizable force field versions were used: flp from previous work [3] and flw modified in this work (referred to as Pol1 and Pol2 in the figures in the main paper).

| LiTFSI molality (m)<br>[force field]                                                        | Number of LiTFSI    | Number of water | Density (g/cm <sup>3</sup> ) |
|---------------------------------------------------------------------------------------------|---------------------|-----------------|------------------------------|
| Polarizable MD using the original (flp) and modified (flw) versions of APPLE&P force fields |                     |                 |                              |
| 13.9 [flp]                                                                                  | 192                 | 768             | 1.580 (1.647)                |
| 21 [flp]                                                                                    | 192                 | 512             | 1.650 (1.714)                |
| 21 [flw]                                                                                    | 384                 | 1024            | 1.725 (1.714)                |
| 21 +7 [flp]                                                                                 | 192 TFSI / 64 LiOTf | 512             | 1.666                        |
| Non-polarizable MD                                                                          |                     |                 |                              |
| 13.9                                                                                        | 626                 | 2500            | 1.646 (1.647)                |
| 20                                                                                          | 720                 | 2000            | 1.719 (1.708)                |

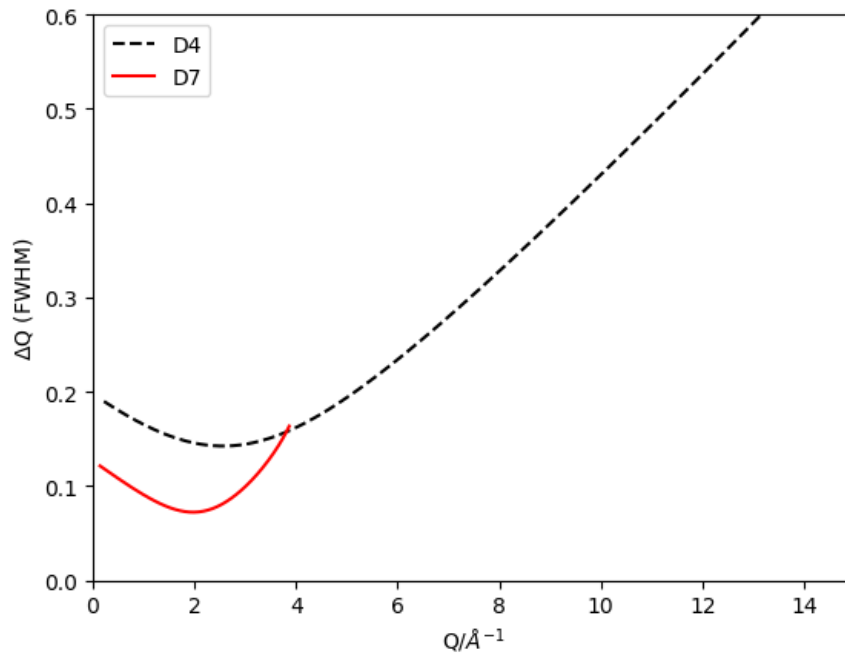

Figure S1. Instrumental resolution of D4 and D7, calculated using the formula of Caglioti *et al.* [4] with parameters  $U = 7.99$ ,  $V = -7.75$  and  $W = 3.2$  for D7 [5] and  $U = 9.3805$ ,  $V = -1.9033$  and  $W = 0.2029$  for D4 [6].

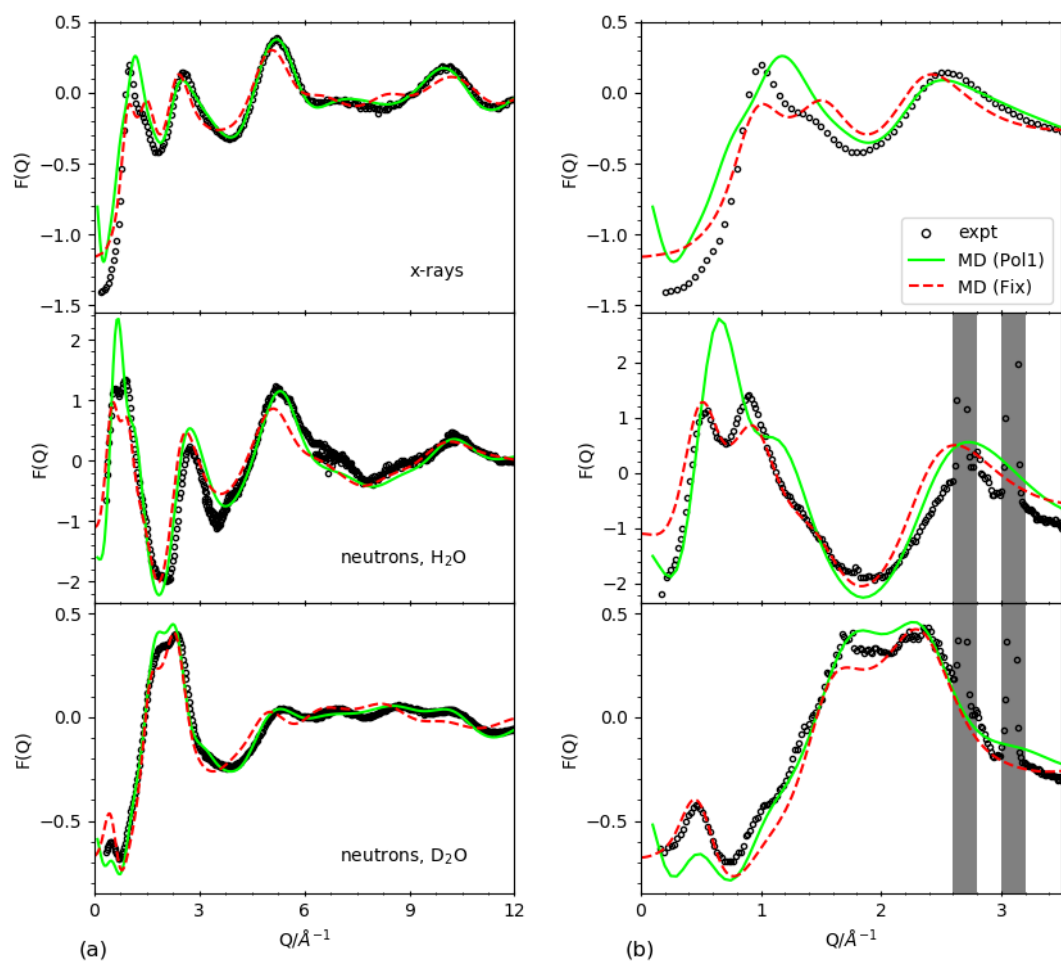

Figure S2. Comparison of the experimental  $F(Q)$  for the 13.9 m solution derived from HEXRD measurements at SPring-8 (top panels), neutron diffraction on  $H_2O$  solutions (middle panels), and neutron diffraction on  $D_2O$  solutions (bottom panels) with those calculated from the polarizable (continuous line) and non-polarizable (dashed line) simulations. Left: full  $Q$  range showing the more relevant features; for simplicity, in the middle and bottom panels only the experimental results obtained on D4 are shown; in both panels, the plotted MD curves have been smeared by the instrument resolution. Right: blow-up showing the low- $Q$  region where the main differences between experiment and simulation are observed; here only data from D7 are shown in the middle and bottom panels, and no smearing is applied to the MD curves.

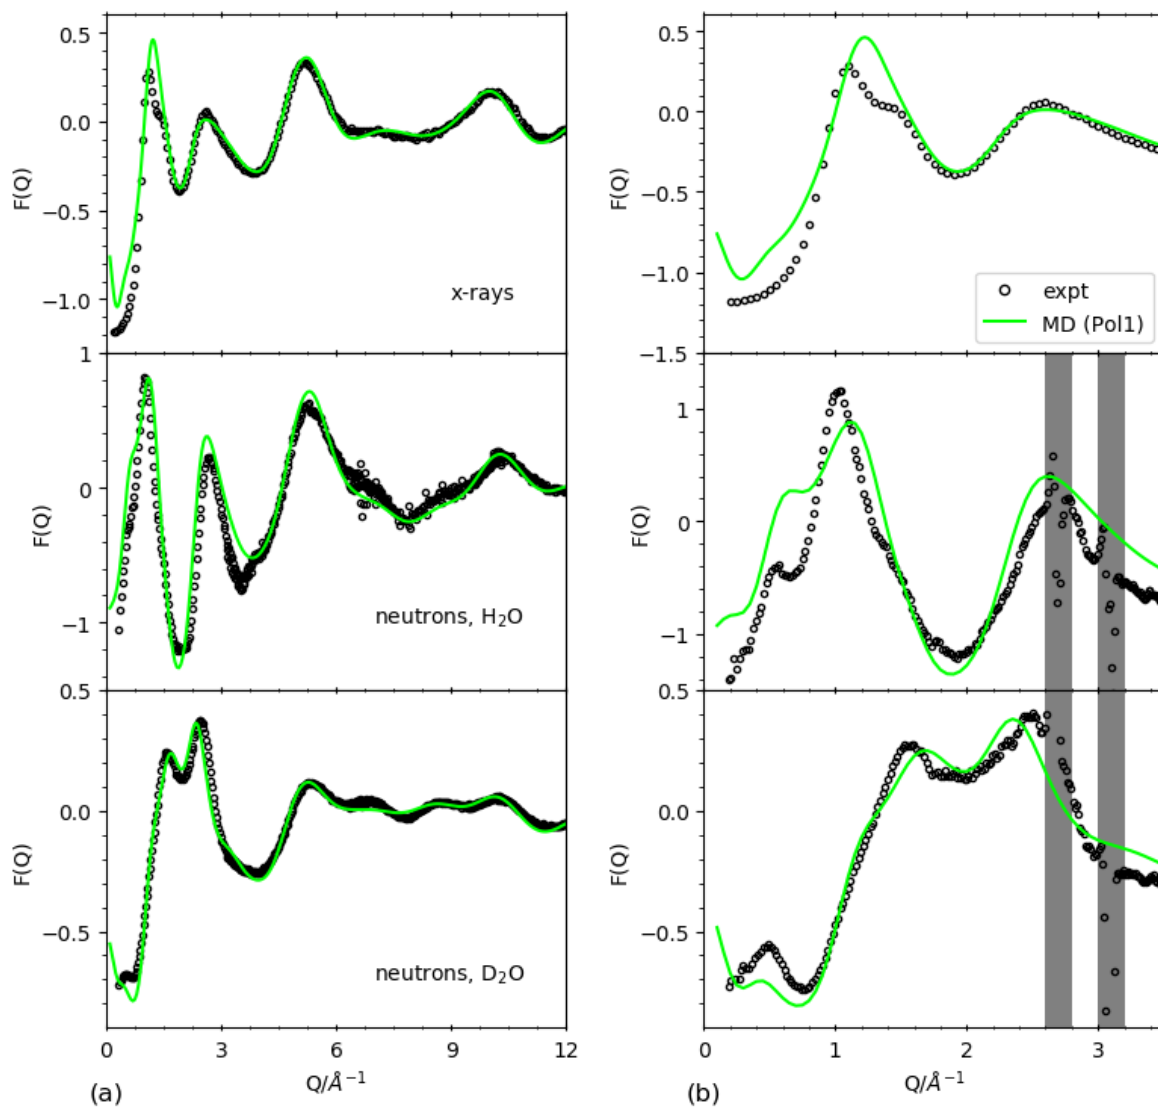

Figure S3. Comparison of the experimental  $F(Q)$  for the (21 m + 7 m) solution derived from HEXRD measurements at SPring-8 (top panels), neutron diffraction on  $\text{H}_2\text{O}$  solutions (middle panels), and neutron diffraction on  $\text{D}_2\text{O}$  solutions (bottom panels) with those calculated from the polarizable simulations. Left: full  $Q$  range showing the more relevant features; for simplicity, in the middle and bottom panels only the experimental results obtained on D4 are shown; in both panels, the plotted MD curves have been smeared by the instrument resolution. Right: blow-up showing the low- $Q$  region where the main difference between experiment and simulation are observed; here only data from D7 are shown in the middle and bottom panels, and no smearing is applied to the MD curves.

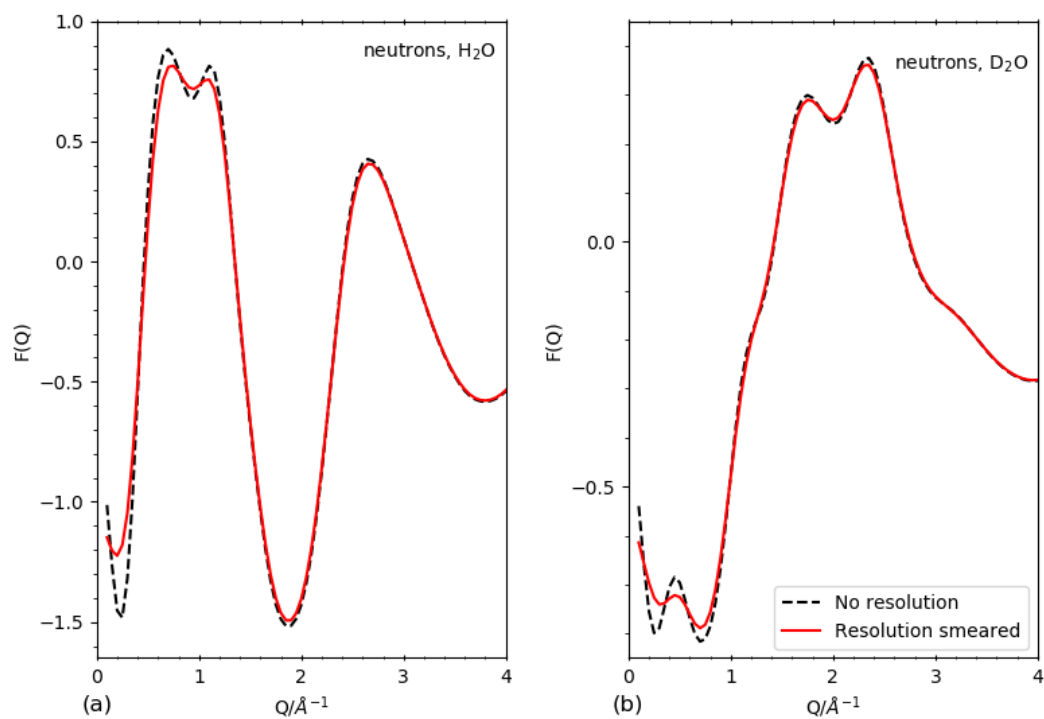

Figure S4.  $F(Q)$  from the polarizable simulations for the (left) H<sub>2</sub>O and (right) D<sub>2</sub>O 21m solutions, showing the effect of applying a resolution smearing equivalent to the instrumental resolution of D4. We used a Gaussian resolution function with a  $Q$ -dependent FWHM given by the D4 line shown in Fig. S1.

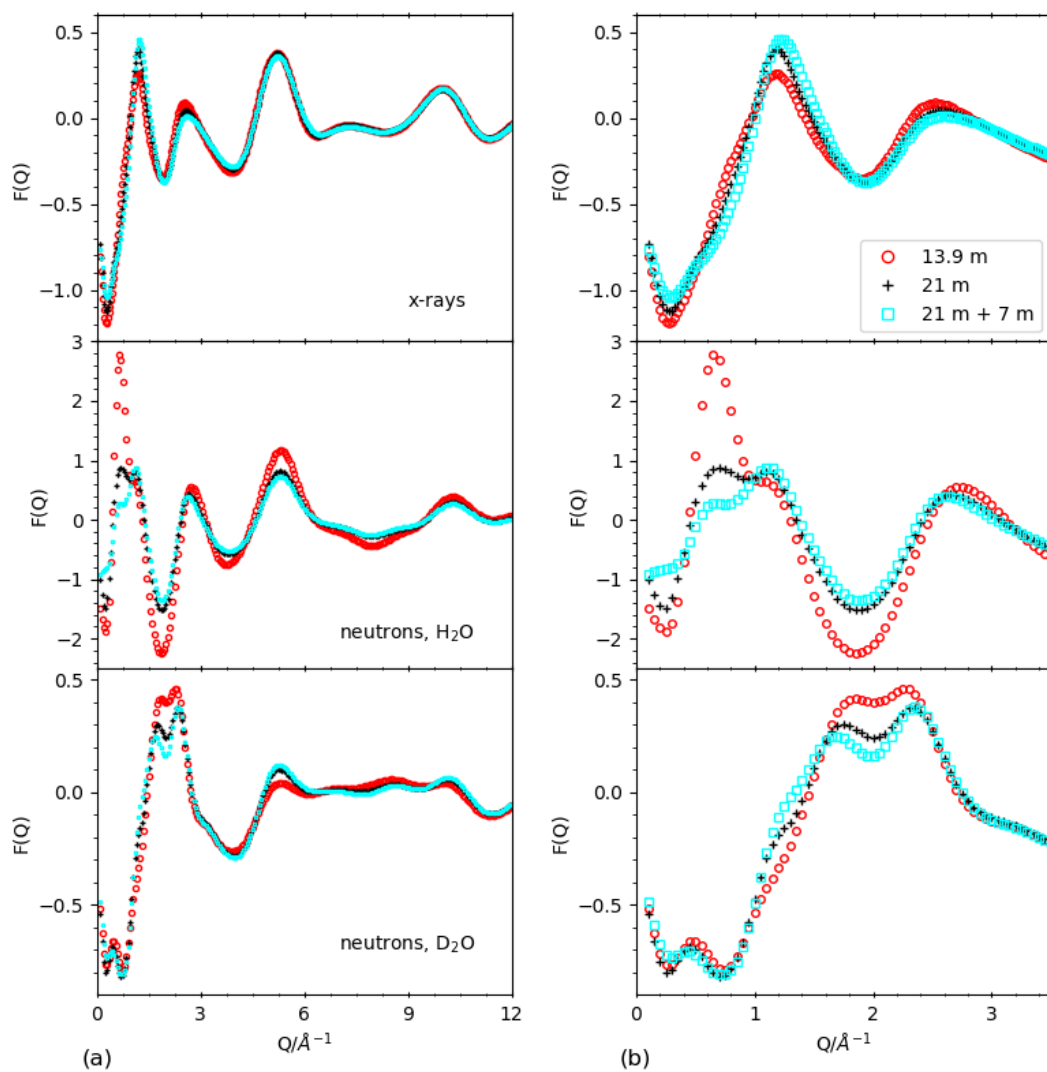

Figure S5.  $F(Q)$  for the 13.9 m, 21 m and (21 m + 7 m) solutions derived from the polarizable MD simulations using x-ray weights (top panels) and neutron weights for  $\text{H}_2\text{O}$  (middle panels) and  $\text{D}_2\text{O}$  solutions (bottom panels). Left: full  $Q$  range showing the more relevant features. Right: blow-up of the low- $Q$  region showing the main changes in  $F(Q)$  with increasing salt concentration.



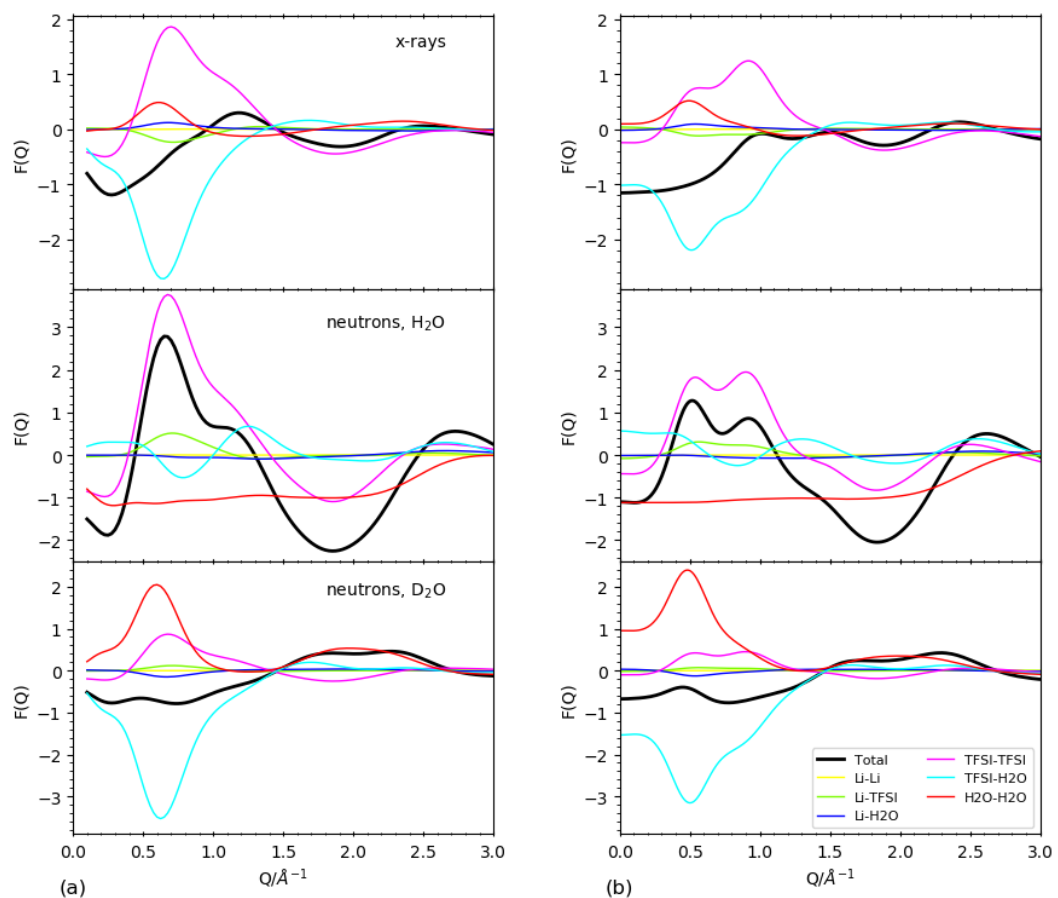

Figure S6. Contributions to the x-ray (top panels) and neutron weighted structure factors for H<sub>2</sub>O (middle panels) and D<sub>2</sub>O (bottom panels) for different molecular/ionic pairs (see text), showing the respective contribution of each partial to the MD weighted average  $F(Q)$ s of the 13.9 m solution shown in Fig. S2 and replotted here as the solid thick line. Results from the (left) polarizable (Pol1) and (right) non-polarizable simulations (Fix).

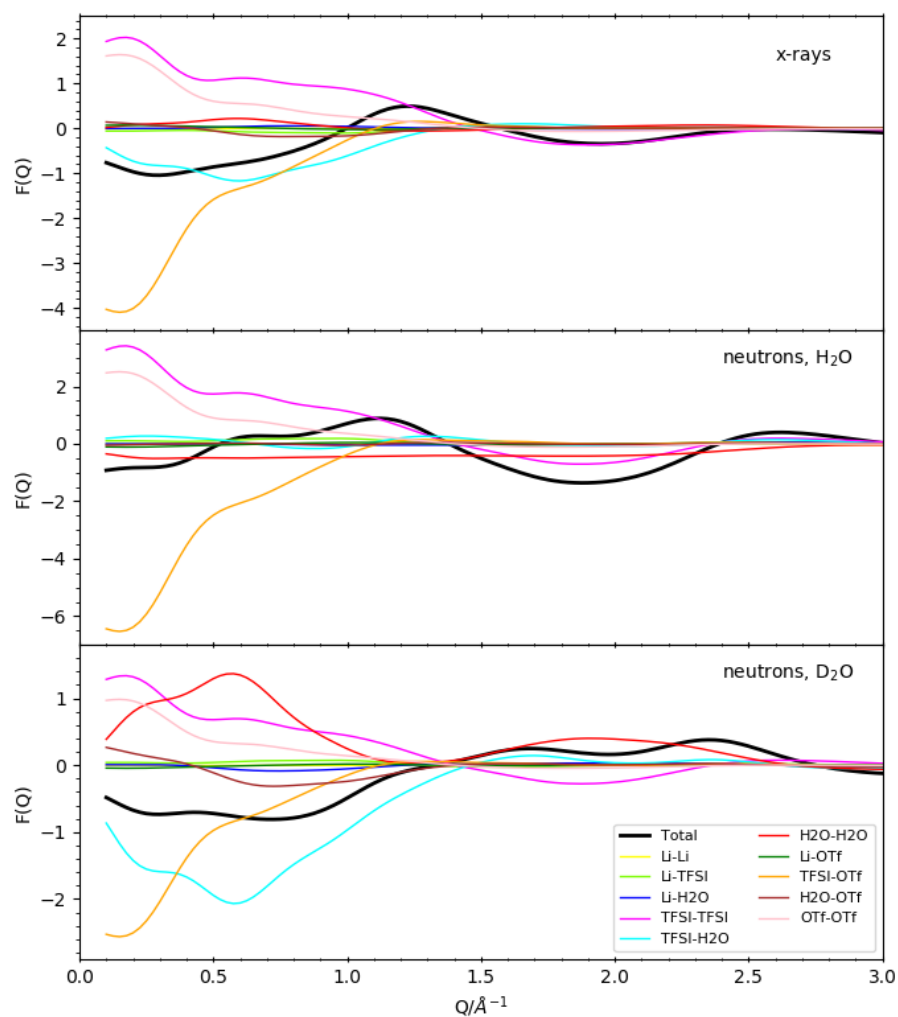

Figure S7. Contributions to the x-ray (top panels) and neutron weighted structure factors for H<sub>2</sub>O (middle panels) and D<sub>2</sub>O (bottom panels) for different molecular/ionic pairs (see text of main paper), showing the respective contribution of each partial to the MD weighted average  $F(Q)$ s of the (21 m + 7 m) solution from the polarizable simulations shown in Fig. S3 and replotted here as solid thick lines.

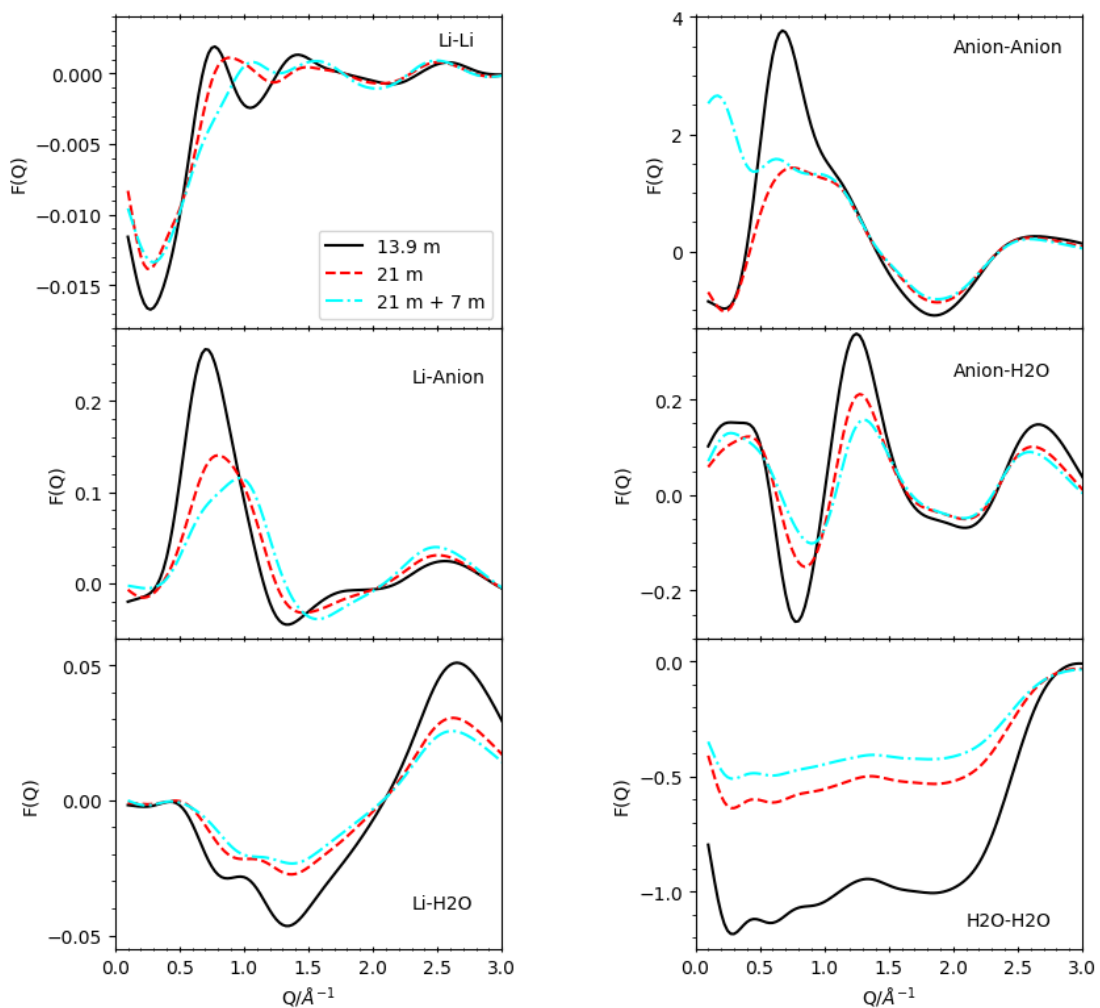

Figure S8. Contributions to the neutron weighted structure factors for H<sub>2</sub>O solutions for different molecular/ionic pairs as a function of the concentration (see text), grouping together the two anions for the (21 m + 7 m) solution, obtained from the polarizable simulations.

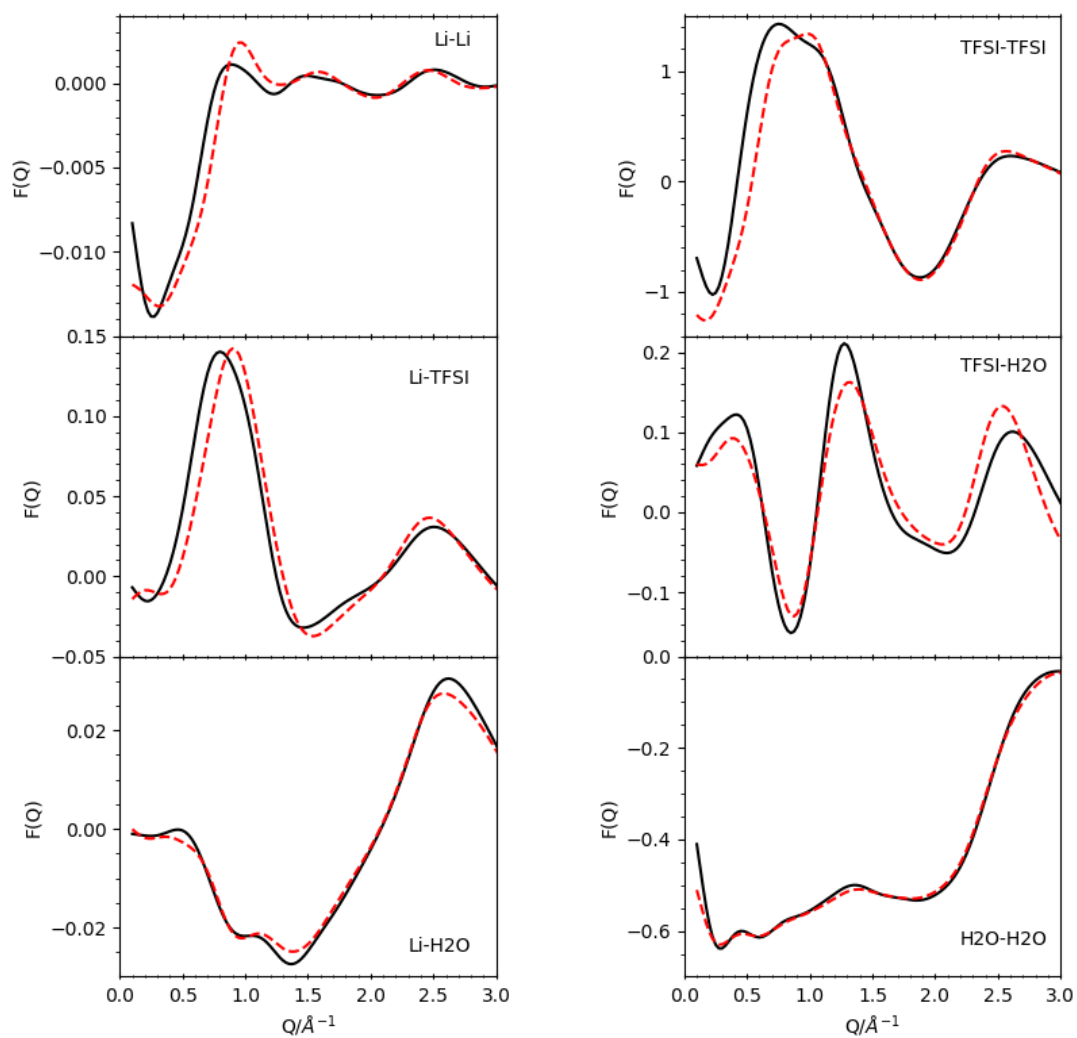

Figure S9. The six grouped molecular/ionic partial interference functions obtained from the polarizable simulations for the 21 m H<sub>2</sub>O solution with the original (continuous black line) and modified (dashed red line) force fields.

## APPLE&P Polarizable Force Field Revision

One source of inaccuracy of the solution structural description by the APPLE&P force field could be due to an inadequate description of water near the  $-\text{CF}_3$  part of the TFSI<sup>-</sup> anions. We selected a small model system of  $\text{C}_2\text{F}_6/\text{H}_2\text{O}$  that allows an accurate prediction of binding energy using quantum chemistry methods in order to benchmark the ability of the force field to describe this interaction. A coupled cluster method with iterative inclusion of single and double excitations with perturbative inclusion of triple excitations (CCSD(T)) was used together with the basis set (CSB) extrapolation. Such CCSD(T)/CBS energy is a reliable benchmark for testing ability of APPLE&P force field to predict binding energies. The CCSD(T)/CBS extrapolated energy was estimated from MP2/CBS energy by adding a difference (CCSD(T)/aug-cc-pvTz – MP2/aug-cc-pvTz). The MP2/CBS energy was extrapolated using  $E(\text{CBS})=a/(X^3)+c$  relation, where  $X=3$  for aug-cc-pvTz and  $X=4$  for aug-cc-pvQz, while  $a,c$  are constants determined by fitting binding energies from MP2/aug-cc-pvQz and MP2/aug-cc-pvTz calculations. The resulting raw and basis set superposition error (BSSE) corrected energies are listed in Table S5 corresponding to the  $\text{C}_2\text{F}_6/\text{H}_2\text{O}$  geometries optimized at the MP2/aug-cc-pvTz level and shown in Figure S10.

The previously used force field (FF, flp) predicts lower binding energies of water to  $\text{C}_2\text{F}_6$  compared to CCSD(T)/CSB QC values. The repulsion parameters of the exp-6 non-bonded terms were modified in this work (FF, flw) to bring the  $\text{C}_2\text{F}_6/\text{H}_2\text{O}$  binding energies in better agreement with QC values. The  $\text{C}_m\text{-O}_w$  repulsion-dispersion parameters from PEO- $\text{H}_2\text{O}$  force field were adopted from [7]. Weaker repulsion between  $-\text{CF}_3$  groups and  $\text{H}_2\text{O}$  results in a slight increase of electrolyte density as shown in Table S4. Force field files with the original (ff.dat\_flp\_C2F6-H2O) and revised (ff.dat\_flw\_C2F6-H2O) parameters are included in the tar archive provided together with the SI.

Table S5. The non-bonded component of the binding energies (in kcal mol<sup>-1</sup>) for C<sub>2</sub>F<sub>6</sub>/H<sub>2</sub>O at MP2/aug-cc-pvTz geometries shown in Figure S10.

| method              | geometry (a) |              | geometry (b) |              | geometry (c) |              |
|---------------------|--------------|--------------|--------------|--------------|--------------|--------------|
|                     | BSSE         |              | BSSE         |              | BSSE         |              |
|                     | raw          | corrected    | raw          | corrected    | raw          | corrected    |
| MP2/aug-cc-pvTz     | -1.11        | -0.62        | -1.33        | -0.90        | -1.51        | -1.07        |
| MP2/aug-cc-pvQz     | -0.91        | -0.67        | -1.18        | -0.96        | -1.35        | -1.14        |
| MP2/CBS             | -0.76        | -0.71        | -1.07        | -1.00        | -1.23        | -1.19        |
| CCSD(T)/aug-cc-pvTz | -1.30        | -0.79        | -1.50        | -1.05        | -1.71        | -1.26        |
| <b>CCSD(T)/CBS</b>  | <b>-0.95</b> | <b>-0.88</b> | <b>-1.24</b> | <b>-1.15</b> | <b>-1.43</b> | <b>-1.38</b> |
| FF (flw, revised)   |              | -0.84        |              | -1.29        |              | -0.93        |
| FF (flp)            |              | -0.49        |              | -1.07        |              | -0.76        |

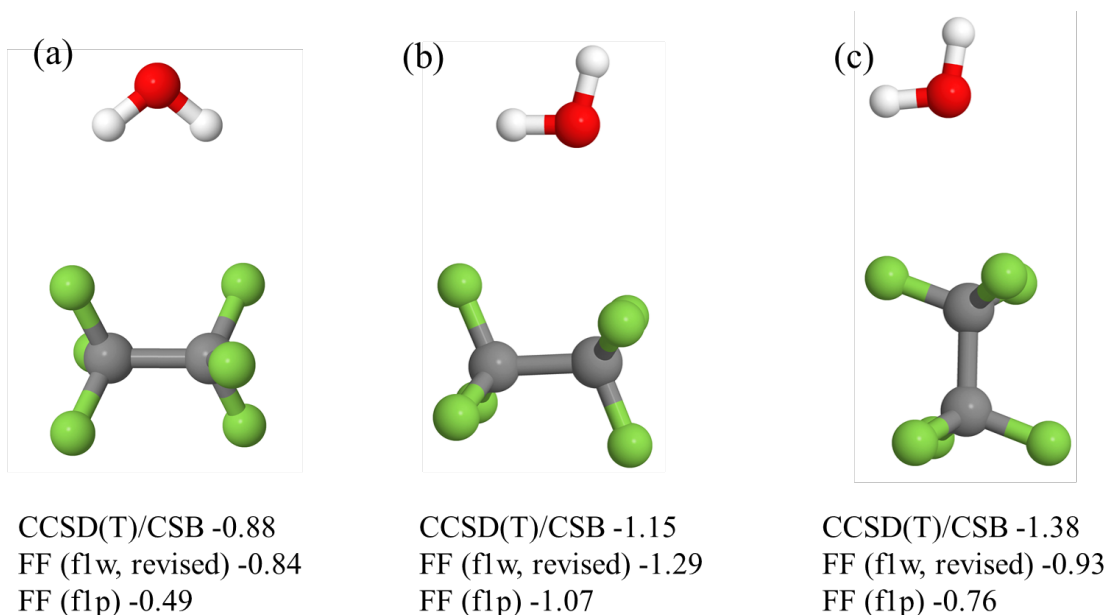

Figure S10. The C<sub>2</sub>F<sub>6</sub>/H<sub>2</sub>O geometries optimized at MP2/aug-cc-pvTz level. The basis set superposition error (BSSE) corrected CCSD(T)/(complete basis set extrapolation, CBS) non-bonded part of the binding energy is shown in kcal mol<sup>-1</sup> together with the energies obtaining using force fields (FFs).

## Summary of the Polarized MD Simulation Methodology using APPLE&P

The Ewald summation method was used for the electrostatic interactions between permanent charges with permanent charges and permanent charges with induced dipole moments with  $k = 7^3$  vectors. Multiple timestep integration was employed with an inner timestep of 0.5 fs (bonded interactions); a central time step of 1.5 fs for all nonbonded interactions within a truncation distance of 7.0-9.0 Å and an outer timestep of 3.0 fs for all nonbonded interactions between 7.0 Å and the nonbonded truncation distance of the smaller of 14-16 Å. The reciprocal part of the Ewald summation was updated only at the largest of the multiple time steps. A Nose-Hoover thermostat and a barostat were used to control the temperature and pressure with associated frequencies of  $10^{-2}$  and  $0.5 \times 10^{-3}$  fs. The atomic coordinates were saved every 2 ps for post-analysis. MD simulations runs were 70 ns for 13.9 m, 227 ns for 21 m using flp force field and 24.7 ns for flw force field for 21 m.

## Convergence of the simulated density in the non-polarized NPT

As shown in Fig. S11, the simulated density converged within 1 ns and the 1-2 ns simulation was used to calculate the equilibrium density.

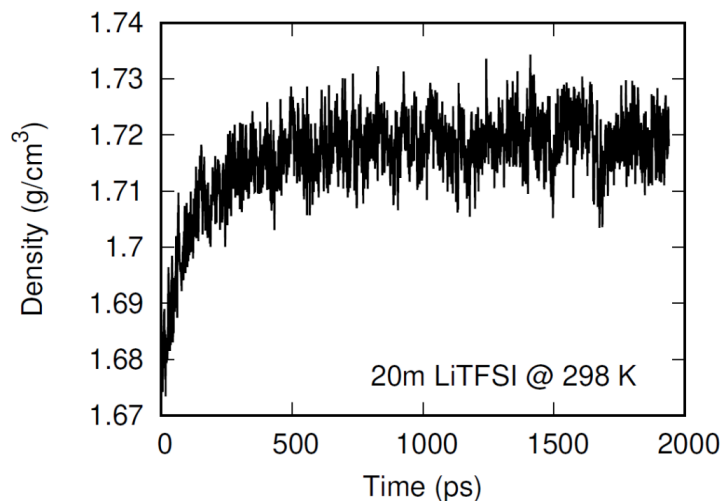

Figure S11. Time evolution of the density on the non-polarized NPT simulation for the 20 m LiTFSI-H<sub>2</sub>O solution at 298 K.

## References

- [1] V. F. Sears. Neutron scattering lengths and cross sections. *Neutron News*, 1992, **3**, 26-37.
- [2] W. J. R. Gilbert, J. Safarov, D. L. Minnick, M. A. Rocha, E. P. Hassel, and M. B. Shiflett. Density, viscosity, and vapor pressure measurements of water + lithium bis(trifluoromethylsulfonyl)imide solutions. *J. Chem. Eng. Data*, 2017, **62**, 2056-2066.
- [3] O. Borodin, L. Suo, M. Gobet, X. Ren, F. Wang, A. Faraone, J. Peng, M. Olguin, M. Schroeder, M. S. Ding, E. Gobrogge, A. von Wald Cresce, S. Munoz, J. A. Dura, S. Greenbaum, C. Wang and K. Xu, Liquid Structure with Nano-Heterogeneity Promotes Cationic Transport in Concentrated Electrolytes, *ACS Nano*, 2017, **11**, 10462-10471.
- [4] G. Caglioti, A. Paoletti, and F. P. Ricci. Choice of collimators for a crystal spectrometer for neutron diffraction. *Nuclear Instrum*, 1958, **3**, 223-228.
- [5] T. Fennell, L. Mangin-Thro, H. Mutka, G. J. Nielsen, and A. R. Wildes. Wavevector and energy resolution of the polarized diffuse scattering spectrometer D7. *Nuclear Instrum. Methods Phys. Res. A*, 2017, **857**, 24-30.
- [6] H. E. Fischer. D4c resolution of the standard configuration (0.5 Å wavelength, Cu220 monochromator, 5 mm diameter sample). *Private communication*.
- [7] O. N. Starovoytov, O. Borodin, D. Bedrov and G. D. Smith, Development of a Polarizable Force Field for Molecular Dynamics Simulations of Poly (Ethylene Oxide) in Aqueous Solution, *J. Chem. Theory Comput.*, 2011, **7**, 1902-1915.
